# Supplementary material for: Does sex affect second ACL injury risk? A systematic review with meta-analysis
Source: HighWire-hosted journal article supplement (doi:10.1136/bjsports-2020-103408), 2021-05-17
Supplement: bjsports-2020-103408supp001_data_supplement.pdf [file bjsports-2020-103408supp001_data_supplement.pdf]

1 **APPENDIX**

2

3

4 **APPENDIX 1. Search Strategy**

5 Date: 8/22/2019

6

Database (including vendor/platform): MEDLINE (via PubMed)

| Set #         |                                                                                                                                                                                                                                                                                                                           | Results   |
|---------------|---------------------------------------------------------------------------------------------------------------------------------------------------------------------------------------------------------------------------------------------------------------------------------------------------------------------------|-----------|
| 1<br>ACL      | "Anterior Cruciate Ligament"[Mesh] OR "Anterior Cruciate Ligament Injuries"[Mesh] OR "anterior cruciate"[tiab] OR ACL[tiab]                                                                                                                                                                                               | 24,115    |
| 2<br>Surgery  | "Anterior Cruciate Ligament Reconstruction"[Mesh] OR autograft[tiab] OR "auto-graft"[tiab] OR HTA[tiab] OR ACLR[tiab] OR surgery[tiab] OR surgeries[tiab] OR procedure[tiab] OR procedures[tiab] OR reconstruction[tiab] OR reconstructions[tiab] OR reconstructed[tiab]                                                  | 2,204,124 |
| 3<br>Reinjury | "Recurrence"[Mesh] OR reinjury[tiab] OR "re-injury"[tiab] OR reinjured[tiab] OR "re-injured"[tiab] OR reinjuries[tiab] OR "re-injuries"[tiab] OR recurrence[tiab] OR recurring[tiab] OR recurrent[tiab] OR ((subsequent[tiab] OR second[tiab] OR secondary[tiab] OR multiple[tiab]) AND (injury[tiab] OR injuries[tiab])) | 716,976   |
| 4             | 1 AND 2 AND 3                                                                                                                                                                                                                                                                                                             | 1,505     |
| 5             | 4 NOT (Editorial[ptyp] OR Comment[ptyp])                                                                                                                                                                                                                                                                                  | 1,496     |
| 6             | 5 NOT (animals[mh] NOT humans[mh])                                                                                                                                                                                                                                                                                        | 1,464     |

7

8

9

10

11

12

13

14

15

16

17

18

19

20

21

22

23

24

25

## 26 Database (including vendor/platform): EMBASE (via Elsevier)

| Set #         |                                                                                                                                                                                                                                                                                                                              | Results   |
|---------------|------------------------------------------------------------------------------------------------------------------------------------------------------------------------------------------------------------------------------------------------------------------------------------------------------------------------------|-----------|
| 1<br>ACL      | 'anterior cruciate ligament'/exp OR 'anterior cruciate ligament injury'/exp OR 'anterior cruciate':ti,ab OR ACL:ti,ab                                                                                                                                                                                                        | 30,985    |
| 2<br>Surgery  | 'anterior cruciate ligament reconstruction'/exp OR autograft:ti,ab OR 'auto-graft':ti,ab OR HTA:ti,ab OR ACLR:ti,ab OR surgery:ti,ab OR surgeries:ti,ab OR procedure:ti,ab OR procedures:ti,ab OR reconstruction:ti,ab OR reconstructions:ti,ab OR reconstructed:ti,ab                                                       | 2,991,980 |
| 3<br>Reinjury | 'recurrence risk'/exp OR reinjury:ti,ab OR 're-injury':ti,ab OR reinjured:ti,ab OR 're-injured':ti,ab OR reinjuries:ti,ab OR 're-injuries':ti,ab OR recurrence:ti,ab OR recurring:ti,ab OR recurrent:ti,ab OR ((subsequent:ti,ab OR second:ti,ab OR secondary:ti,ab OR multiple:ti,ab) AND (injury:ti,ab OR injuries:ti,ab)) | 958,579   |
| 4             | 1 AND 2 AND 3                                                                                                                                                                                                                                                                                                                | 1,955     |
| 5             | 4 AND ([article]/lim OR [article in press]/lim OR [letter]/lim OR [review]/lim)                                                                                                                                                                                                                                              | 1,420     |
| 6             | 5 AND [humans]/lim                                                                                                                                                                                                                                                                                                           | 1,354     |

27  
28  
29  
30  
31  
32  
33  
34  
35  
36  
37  
38  
39  
40  
41  
42  
43  
44  
45  
46  
47  
48  
49  
50

## 51 Database (including vendor/platform): CINAHL (via EBSCO)

| Set #         |                                                                                                                                                                                                                                                                                                                                                                                                                                                               | Results |
|---------------|---------------------------------------------------------------------------------------------------------------------------------------------------------------------------------------------------------------------------------------------------------------------------------------------------------------------------------------------------------------------------------------------------------------------------------------------------------------|---------|
| 1<br>ACL      | (MH "Anterior Cruciate Ligament" OR MH "Anterior Cruciate Ligament Injuries") OR TI ( "anterior cruciate" OR ACL ) OR AB ( "anterior cruciate" OR ACL )                                                                                                                                                                                                                                                                                                       | 11,829  |
| 2<br>Surgery  | (MH "Anterior Cruciate Ligament Reconstruction") OR TI ( autograft OR "auto-graft" OR HTA OR ACLR OR surgery OR surgeries OR procedure OR procedures OR reconstruction OR reconstructions OR reconstructed ) OR AB ( autograft OR "auto-graft" OR HTA OR ACLR OR surgery OR surgeries OR procedure OR procedures OR reconstruction OR reconstructions OR reconstructed )                                                                                      | 356,241 |
| 3<br>Reinjury | (MH "Recurrence" OR MH "Reinjury") OR TI ( reinjury OR "re-injury" OR reinjured OR "re-injured" OR reinjuries OR "re-injuries" OR recurrence OR recurring OR recurrent OR ((subsequent OR second OR secondary OR multiple) AND (injury OR injuries)) ) OR AB ( reinjury OR "re-injury" OR reinjured OR "re-injured" OR reinjuries OR "re-injuries" OR recurrence OR recurring OR ((subsequent OR second OR secondary OR multiple) AND (injury OR injuries)) ) | 113,076 |
| 4             | 1 AND 2 AND 3                                                                                                                                                                                                                                                                                                                                                                                                                                                 | 839     |
| 5             | 4 AND Limiters - Publication Type: Clinical Trial, Journal Article, Letter, Meta Analysis, Meta Synthesis, Practice Guidelines, Randomized Controlled Trial, Review, Systematic Review                                                                                                                                                                                                                                                                        | 538     |

52  
53  
54  
55  
56  
57  
58  
59  
60  
61  
62  
63  
64  
65  
66  
67  
68  
69  
70

## 71 Database (including vendor/platform): SPORTDiscus (via EBSCO)

| Set #         |                                                                                                                                                                                                                                                                                                                                                                                                                     | Results |
|---------------|---------------------------------------------------------------------------------------------------------------------------------------------------------------------------------------------------------------------------------------------------------------------------------------------------------------------------------------------------------------------------------------------------------------------|---------|
| 1<br>ACL      | (DE "ANTERIOR cruciate ligament" OR DE "ANTERIOR cruciate ligament injuries") OR TI("anterior cruciate" OR ACL) OR AB("anterior cruciate" OR ACL)                                                                                                                                                                                                                                                                   | 10,355  |
| 2<br>Surgery  | (DE "ANTERIOR cruciate ligament surgery" OR DE "ANTERIOR cruciate ligament transplantation") OR TI("autograft OR "auto-graft" OR HTA OR ACLR OR surgery OR surgeries OR procedure OR procedures OR reconstruction OR reconstructions OR reconstructed) OR AB("autograft OR "auto-graft" OR HTA OR ACLR OR surgery OR surgeries OR procedure OR procedures OR reconstruction OR reconstructions OR reconstructed)    | 57,184  |
| 3<br>Reinjury | TI( reinjury OR "re-injury" OR reinjured OR "re-injured" OR reinjuries OR "re-injuries" OR recurrence OR recurring OR recurrent OR ((subsequent OR second OR secondary OR multiple) AND (injury OR injuries))) OR AB( reinjury OR "re-injury" OR reinjured OR "re-injured" OR reinjuries OR "re-injuries" OR recurrence OR recurring OR ((subsequent OR second OR secondary OR multiple) AND (injury OR injuries))) | 12,955  |
| 4             | 1 AND 2 AND 3                                                                                                                                                                                                                                                                                                                                                                                                       | 573     |

72  
73  
74  
75  
76  
77  
78  
79  
80  
81  
82  
83  
84  
85  
86  
87  
88  
89  
90  
91  
92  
93  
94  
95

## 96 Database (including vendor/platform): Scopus (via Elsevier)

| Set #         |                                                                                                                                                                                                                               | Results   |
|---------------|-------------------------------------------------------------------------------------------------------------------------------------------------------------------------------------------------------------------------------|-----------|
| 1<br>ACL      | TITLE-ABS ( "anterior cruciate" OR acl )                                                                                                                                                                                      | 30,854    |
| 2<br>Surgery  | TITLE-ABS ( autograft OR "auto-graft" OR hta OR aclr OR surgery OR surgeries OR procedure OR procedures OR reconstruction OR reconstructions OR reconstructed )                                                               | 4,099,026 |
| 3<br>Reinjury | TITLE-ABS ( reinjury OR "re-injury" OR reinjured OR "re-injured" OR reinjuries OR "re-injuries" OR recurrence OR recurring OR recurrent OR ( ( subsequent OR second OR secondary OR multiple ) AND ( injury OR injuries ) ) ) | 857,866   |
| 4             | 1 AND 2 AND 3                                                                                                                                                                                                                 | 1,708     |
| 5             | 4 AND ( LIMIT-TO ( DOCTYPE , "ar" ) OR LIMIT-TO ( DOCTYPE , "re" ) OR LIMIT-TO ( DOCTYPE , "le" ) )                                                                                                                           | 1,563     |

97  
98  
99  
100  
101  
102  
103  
104  
105  
106  
107  
108  
109  
110  
111  
112  
113  
114  
115  
116  
117  
118  
119  
120  
121  
122  
123  
124  
125

126 **APPENDIX 2. Studies Contacted for Clarifying Data and Responses Received**

| Data clarification lead to inclusion |      |                                                                                                                                                                                   |
|--------------------------------------|------|-----------------------------------------------------------------------------------------------------------------------------------------------------------------------------------|
| Authors                              | Year | Title                                                                                                                                                                             |
| Beischer et al                       | 2020 | Young athletes who return to sport before 9 months after anterior cruciate ligament reconstruction have a rate of new injury 7 times that of those who delay return               |
| Bourke et al                         | 2012 | Survival of the anterior cruciate ligament graft and the contralateral ACL at a minimum of 15 years                                                                               |
| Everhart et al                       | 2019 | Femoral nerve block at time of ACL reconstruction causes lasting quadriceps strength deficits and may increase short-term risk of re-injury                                       |
| Fleming et al                        | 2013 | The effect of initial graft tension after anterior cruciate ligament reconstruction: a randomized clinical trial with 36-month follow-up                                          |
| Kamath et al                         | 2014 | Anterior cruciate ligament injury, return to play, and reinjury in the elite collegiate athlete: analysis of an NCAA Division I cohort                                            |
| Webster et al                        | 2019 | Clinical Tests Can Be Used to Screen for Second Anterior Cruciate Ligament Injury in Younger Patients Who Return to Sport                                                         |
| Data clarification lead to exclusion |      |                                                                                                                                                                                   |
| Authors                              | Year | Title                                                                                                                                                                             |
| Herbst et al                         | 2017 | Impact of surgical timing on the outcome of anterior cruciate ligament reconstruction                                                                                             |
| Leys et al                           | 2012 | Clinical results and risk factors for reinjury 15 years after anterior cruciate ligament reconstruction: a prospective study of hamstring and patellar tendon grafts              |
| McPherson et al                      | 2019 | Psychological readiness to return to sport is associated with second anterior cruciate ligament injuries                                                                          |
| McRae et al                          | 2013 | Ipsilateral versus contralateral hamstring grafts in anterior cruciate ligament reconstruction: a prospective randomized trial                                                    |
| Schmale et al                        | 2014 | High satisfaction yet decreased activity 4 years after transphyseal ACL reconstruction                                                                                            |
| Paterno et al                        | 2010 | Biomechanical measures during landing and postural stability predict second anterior cruciate ligament injury after anterior cruciate ligament reconstruction and return to sport |
| Paterno et al                        | 2017 | Clinical factors that predict a second ACL injury after ACL reconstruction and return to sport: preliminary development of a clinical decision algorithm                          |
| Paterno et al                        | 2018 | Self-reported fear predicts functional performance and second ACL injury after ACL reconstruction and return to sport: a pilot study                                              |
| Webster et al                        | 2014 | Younger patients are at increased risk for graft rupture and contralateral injury after anterior cruciate ligament reconstruction                                                 |
| Data could not be clarified          |      |                                                                                                                                                                                   |

| Authors         | Year | Title                                                                                                                                                                     |
|-----------------|------|---------------------------------------------------------------------------------------------------------------------------------------------------------------------------|
| Akada et al     | 2019 | Partial meniscectomy adversely affects return-to-sport outcome after anatomical double-bundle anterior cruciate ligament reconstruction                                   |
| Astur et al     | 2018 | Increased incidence of anterior cruciate ligament revision surgery in paediatric versus adult population                                                                  |
| Barrett et al   | 2010 | Allograft anterior cruciate ligament reconstruction in the young, active patient: Tegner activity level and failure rate                                                  |
| Calvo et al     | 2015 | Transphyseal anterior cruciate ligament reconstruction in patients with open physes: 10-year follow-up study                                                              |
| Dekker et al    | 2017 | Return to sport after pediatric anterior cruciate ligament reconstruction and its effect on subsequent anterior cruciate ligament injury                                  |
| Falciglia et al | 2016 | Anterior cruciate ligament reconstruction in adolescents (Tanner stages 2 and 3)                                                                                          |
| Gans et al      | 2018 | Epidemiology of recurrent anterior cruciate ligament injuries in National Collegiate Athletic Association sports: the Injury Surveillance Program, 2004-2014              |
| Geffroy et al   | 2018 | Return to sport and re-tears after anterior cruciate ligament reconstruction in children and adolescents                                                                  |
| Granan et al    | 2015 | Associations between inadequate knee function detected by KOOS and prospective graft failure in an anterior cruciate ligament-reconstructed knee                          |
| Grindem et al   | 2012 | A pair-matched comparison of return to pivoting sports at 1 year in anterior cruciate ligament-injured patients after a nonoperative versus an operative treatment course |
| Grindem et al   | 2014 | Nonsurgical or surgical treatment of ACL injuries: knee function, sports participation, and knee reinjury: the Delaware-Oslo ACL Cohort Study                             |
| Grindem et al   | 2016 | Simple decision rules can reduce reinjury risk by 84% after ACL reconstruction: the Delaware-Oslo ACL cohort study                                                        |
| Gupta et al     | 2018 | Low re-rupture rate with BPTB autograft and semitendinosus gracilis autograft with preserved insertions in ACL reconstruction surgery in sports persons                   |
| Gupta et al     | 2019 | Is anterior cruciate ligament graft rupture (after successful anterior cruciate ligament reconstruction and return to sports                                              |
| Herbst et al    | 2017 | Impact of surgical timing on the outcome of anterior cruciate ligament reconstruction                                                                                     |
| Imbert et al    | 2017 | Midterm results of combined intra-and extra-articular ACL reconstruction compared to historical ACL reconstruction data                                                   |
| Ithurburn et al | 2019 | Knee function, strength, and resumption of preinjury sports participation in young athletes following anterior cruciate ligament reconstruction                           |

|                     |      |                                                                                                                                                                                    |
|---------------------|------|------------------------------------------------------------------------------------------------------------------------------------------------------------------------------------|
| Kaeding et al       | 2015 | Risk factors and predictors of subsequent ACL injury in either knee after ACL reconstruction: prospective analysis of 2488 primary ACL reconstructions from the MOON cohort        |
| Koga et al          | 2015 | Effect of posterolateral bundle graft fixation angles on clinical outcomes in double-bundle anterior cruciate ligament reconstruction: a randomized controlled trial               |
| Lebel et al         | 2008 | Arthroscopic reconstruction of the anterior cruciate ligament using bone-patellar tendon-bone autograft: a minimum 10-year follow-up                                               |
| Magnussen et al     | 2012 | Graft size and patient age are predictors of early revision after anterior cruciate ligament reconstruction with hamstring autograft                                               |
| Magnussen et al     | 2016 | Effect of high-grade preoperative knee laxity on anterior cruciate ligament reconstruction outcomes                                                                                |
| Nwachukwu et al     | 2017 | Return to play and patient satisfaction after ACL reconstruction: study with minimum 2-year follow-up                                                                              |
| Oates et al         | 1999 | Comparative injury rates of uninjured, anterior cruciate ligament-deficient, and reconstructed knees in a skiing population                                                        |
| Pennock et al       | 2018 | Use of a modified all-epiphyseal technique for anterior cruciate ligament reconstruction in the skeletally immature patient                                                        |
| Rousseau et al      | 2019 | Complications after anterior cruciate ligament reconstruction and their relation to the type of graft: a prospective study of 958 cases                                            |
| Siebold et al       | 2016 | Anatomical "C"-shaped double-bundle versus single-bundle anterior cruciate ligament reconstruction in pre-adolescent children with open growth plates                              |
| Snaebjörnsson et al | 2017 | Adolescents and female patients are at increased risk for contralateral anterior cruciate ligament reconstruction: a cohort study from the Swedish National Knee Ligament Register |
| Sousa et al         | 2017 | Return to sport: does excellent 6-month strength and function following ACL reconstruction predict midterm outcomes?                                                               |
| Takazawa et al      | 2013 | ACL reconstruction preserving the ACL remnant achieves good clinical outcomes and can reduce subsequent graft rupture                                                              |
| Takazawa et al      | 2016 | Anterior cruciate ligament injuries in elite and high school rugby players: a 11-year review                                                                                       |
| Wall et al          | 2017 | Outcomes and complications after all-epiphyseal anterior cruciate ligament reconstruction in skeletally immature patients                                                          |
| Wernecke et al      | 2017 | The diameter of single bundle, hamstring autograft does not significantly influence revision rate or clinical outcomes after anterior cruciate ligament reconstruction             |



128 **APPENDIX 3. Summary of Findings and Strength of the Evidence Using GRADE**

| GRADE Criteria                                      | Total Second ACLI Risk                                                                               | Justification                                                                                                              | Ipsilateral ACLI Risk                                                                                                                 | Justification                                                                                                | Contralateral ACLI Risk                                                                                                 | Justification                                                                                                                     |
|-----------------------------------------------------|------------------------------------------------------------------------------------------------------|----------------------------------------------------------------------------------------------------------------------------|---------------------------------------------------------------------------------------------------------------------------------------|--------------------------------------------------------------------------------------------------------------|-------------------------------------------------------------------------------------------------------------------------|-----------------------------------------------------------------------------------------------------------------------------------|
| Study Design <sup>§</sup>                           | +2                                                                                                   | RCT and non-RCT included                                                                                                   | +2                                                                                                                                    | RCT and non-RCT included                                                                                     | +2                                                                                                                      | RCT and non-RCT included                                                                                                          |
| Risk of Bias*                                       | 0                                                                                                    | Only low or moderate RoB included                                                                                          | 0                                                                                                                                     | Only low or moderate RoB included                                                                            | 0                                                                                                                       | Only low or moderate RoB included                                                                                                 |
| Inconsistency*                                      | -1                                                                                                   | Inconsistency is present, ( $I^2=50%$ , $p=0.02$ ) and could be meaningful                                                 | -1                                                                                                                                    | Inconsistency is present ( $I^2=52%$ , $p=0.02$ ) and could be meaningful.                                   | 0                                                                                                                       | Inconsistency is not present ( $I^2=0%$ , $p=0.67$ )                                                                              |
| Indirectness*                                       | 0                                                                                                    | No concerns for indirectness                                                                                               | 0                                                                                                                                     | No concerns for indirectness                                                                                 | 0                                                                                                                       | No concerns for indirectness                                                                                                      |
| Imprecision*                                        | -1                                                                                                   | There is concern for imprecision of the estimate due to each end of the confidence intervals indicating an opposite effect | 0                                                                                                                                     | There is minimal concern for imprecision based on tight confidence intervals despite a null estimate for RR. | 0                                                                                                                       | There is minimal concern for imprecision based on tight confidence intervals despite an estimate that includes the null estimate. |
| Publication Bias <sup>&amp;</sup>                   | 0                                                                                                    | Not detected                                                                                                               | 0                                                                                                                                     | Not detected                                                                                                 | 0                                                                                                                       | Not detected                                                                                                                      |
| Upgrading Factors <sup>#</sup>                      | 0                                                                                                    | No upgrading factors                                                                                                       | 0                                                                                                                                     | No upgrading factors                                                                                         | 0                                                                                                                       | No upgrading factors                                                                                                              |
| <b>GRADE Quality of Evidence Score<sup>§§</sup></b> | Very Low                                                                                             |                                                                                                                            | Very Low                                                                                                                              |                                                                                                              | Low                                                                                                                     |                                                                                                                                   |
| <b>Summary of Findings</b>                          | There was no difference in the relative or absolute risk of a second ACLI between males and females. |                                                                                                                            | There was no difference in the relative risk, but females have a 3.5% reduced absolute risk of an ipsilateral ACLI compared to males. |                                                                                                              | Females were found to have 1.27 times higher relative risk of experiencing a contralateral ACL injury compared to males |                                                                                                                                   |

129 GRADE= Grading of Recommendations, Assessment, Development and Evaluation, RCT= randomized controlled  
 130 trial, Non-RCT= nonrandomized controlled trail, ACLI= anterior cruciate ligament injury, RoB= Risk of Bias

131 § RCT (+4, high quality), Non-RCT (+2, low quality)

132 \*Judged as No (0), Serious (-1), Very Serious (-2)

133 &Undetected (0), Strongly Suspected (-1)

134 #Large Effect (+1 or +2), Dose Response (+1 or +2), No Plausible Confounding (+1 or +2)

135 §§Overall Quality of Evidence Score = sum of rating score given of all GRADE criteria

136 † High quality (score  $\geq 4$ ), moderate quality (score = 3), Low quality (score = 2), very low quality (score  $\leq 1$ )

137

138

139

140

141

142

143

144

145

146

147

148 **APPENDIX 4. A Measurement Tool to Assess systematic Reviews Version 2**

| <b>Question</b> | <b>Criteria Met: Yes/No/Partial Yes</b> | <b>Justification</b>                                                                                                                                                                                      |
|-----------------|-----------------------------------------|-----------------------------------------------------------------------------------------------------------------------------------------------------------------------------------------------------------|
| <b>1</b>        | <b>Yes</b>                              | PICO established in research question and selection criteria.                                                                                                                                             |
| <b>2</b>        | <b>Yes</b>                              | Methods were established prior to conducting this review.                                                                                                                                                 |
| <b>3</b>        | <b>Yes</b>                              | Explanation provided for inclusion of RCTs and NRSI                                                                                                                                                       |
| <b>4</b>        | <b>Yes</b>                              | Searched 5 databases, considered grey literature in search design, provided all searches for reviewers, and searched within 12 months of submission.                                                      |
| <b>5</b>        | <b>Yes</b>                              | Two reviewers independently performed study selection.                                                                                                                                                    |
| <b>6</b>        | <b>Yes</b>                              | Two reviewers independently performed data extraction.                                                                                                                                                    |
| <b>7</b>        | <b>Partial Yes</b>                      | A list of reasons for excluded studies provided, but not a complete list of references.                                                                                                                   |
| <b>8</b>        | <b>Yes</b>                              | Adequate description of included studies provided.                                                                                                                                                        |
| <b>9</b>        | <b>Yes</b>                              | RoB was assessed, reported and used to factor into GRADE scoring.                                                                                                                                         |
| <b>10</b>       | <b>Yes</b>                              | Funding sources of included studies were reported.                                                                                                                                                        |
| <b>11</b>       | <b>Yes</b>                              | Appropriate decision to perform statistical analysis provided, methods and justification described in detail. Appropriate weighting performed with meta-regression to determine influence of confounders. |
| <b>12</b>       | <b>Yes</b>                              | High RoB studies were excluded from meta-analysis, and sensitivity analyses reported.                                                                                                                     |
| <b>13</b>       | <b>Yes</b>                              | RoB was reported for each study, influenced meta-analysis inclusion and considered during GRADE scoring.                                                                                                  |
| <b>14</b>       | <b>Yes</b>                              | Yes, heterogeneity was discussed, and limitations were noted that could have contributed.                                                                                                                 |
| <b>15</b>       | <b>Yes</b>                              | Publication bias was reported, discussed and considered during GRADE scoring.                                                                                                                             |
| <b>16</b>       | <b>Yes</b>                              | We report that one listed author of the present study (MVP) was the first author of one study included in this review. However, we                                                                        |

|  |  |                                       |
|--|--|---------------------------------------|
|  |  | declare no other competing interests. |
|--|--|---------------------------------------|

149 PICO= Patient/problem, Intervention, Comparison, Outcome; framework for development of research questions,  
150 RoB= risk of bias, GRADE= Grading of Recommendations, Assessment, Development and Evaluation, RCTs=  
151 Randomized controlled trials, NRSI= Non-randomized studies of healthcare interventions  
152 1=research question and inclusion criteria include PICO? 2= Was review methods/protocol established prior to  
153 conduct of review? 3= Explain selection criteria based on study design? 4= Comprehensive literature search? 5=  
154 Study selection in duplicate? 6= Data extraction in duplicate? 7= List of excluded studies provided? 8= Describe  
155 included studies in adequate detail? 9= Satisfactory technique to assess RoB? 10= Report sources of funding for  
156 included studies? 11= Appropriate statistical methods used for meta-analysis? 12= Assess for impact of RoB on  
157 results of meta-analysis? 13= RoB accounted for when discussing results? 14= Discussion of heterogeneity? 15=  
158 Investigation into publication bias? 16= Any conflict of interest report  
159  
160  
161  
162  
163  
164  
165  
166  
167  
168  
169  
170  
171  
172  
173  
174  
175  
176  
177  
178  
179  
180  
181  
182  
183  
184  
185  
186  
187  
188  
189  
190  
191  
192

193

**Potential Sources of Conflict and Sources of Funding for Included Studies**

| INCLUDED STUDIES                          | Potential Sources of Support (if reported in study)                                                                                                                                                                                                                                                                                                           |
|-------------------------------------------|---------------------------------------------------------------------------------------------------------------------------------------------------------------------------------------------------------------------------------------------------------------------------------------------------------------------------------------------------------------|
| Bak <i>et al</i> <sup>†</sup> (58)        | No reported conflict of interest statement or statement of funding provided                                                                                                                                                                                                                                                                                   |
| Beischer <i>et al</i> <sup>†</sup> (59)   | The authors report no conflicts of interest.<br>Funding: Grants from the Swedish Research Council for Sport Science, by the Local Research and Development Board of Gothenburg and Sodra Bohuskan, and by the Unit of Physiotherapy, Institute of Neuroscience and Physiology, Sahlgrenska Academy, University of Gothenburg.                                 |
| Bourke <i>et al</i> <sup>†</sup> (60)     | “One or more of the authors has declared the following potential conflict of interest or source of funding: Dr. Pinczewski has received research funds from Smith & Nephew in the past 5 years. No funding was received for the current study.”                                                                                                               |
| Cordasco <i>et al</i> (51)                | “One or more of the authors has declared the following potential conflict of interest or source of funding: FAC is a consultant for Arthrex and receives royalties from Conmed Linvatec and Arthrex. DWG is a consultant for and receives royalties from Arthrex.”                                                                                            |
| Dekker <i>et al</i> <sup>†</sup> (61)     | The authors report no conflicts of interest or external sources of funding for this study.                                                                                                                                                                                                                                                                    |
| Demange <i>et al</i> (52)                 | “The authors declared that they have no conflicts of interest in the authorship and publication of this contribution.”                                                                                                                                                                                                                                        |
| Everhart <i>et al</i> <sup>†</sup> (62)   | The authors report no funding for this study and declare no conflicts of interest                                                                                                                                                                                                                                                                             |
| Fleming <i>et al</i> (53)                 | Funding: This study was funded by grants from the National Institutes of Health (RO1-AR047910; RO1-AR047910S1).<br>No conflict of interest statement provided.                                                                                                                                                                                                |
| Geffroy <i>et al</i> (54)                 | Funding: None<br>Conflicts of Interest: NL is a consultant for developing logicielwebsurvey.fr® software.                                                                                                                                                                                                                                                     |
| Graziano <i>et al</i> (55)                | The authors declare no conflicts of interest                                                                                                                                                                                                                                                                                                                  |
| Gupta <i>et al</i> (56)                   | The authors declare no conflicts of interest or funding for this study                                                                                                                                                                                                                                                                                        |
| Heath <i>et al</i> <sup>†</sup> (63)      | The authors declare no conflicts of interest. “AOSSM has not conducted an independent investigation on the Open Payments Database (OPD) and disclaims any liability or responsibility relating thereto.”                                                                                                                                                      |
| Heijne <i>et al</i> <sup>†</sup> (64)     | No conflict of interest statement or statement of funding provided                                                                                                                                                                                                                                                                                            |
| Kamath <i>et al</i> <sup>†</sup> (65)     | “One or more of the authors has declared the following potential conflict of interest or source of funding: This study was paid for by the University of North Carolina at Chapel Hill, Department of Orthopaedic Surgery, Sports Medicine Research Fund.”                                                                                                    |
| Laboute <i>et al</i> (57)                 | Authors declare no conflicts of interest. Funding statement not provided.                                                                                                                                                                                                                                                                                     |
| Mohtadi <i>et al</i> <sup>†</sup> (66)    | “NM and DC are currently receiving a research grant to support this trial, from the Workers’ Compensation Board, Alberta, and received prior funding from the Calgary Orthopaedic Research and Education Fund (COREF). The remaining authors report no conflicts of interest.”                                                                                |
| Paterno <i>et al</i> <sup>†</sup> (31)    | “One or more of the authors has declared the following potential conflicts of interest or source of funding: The study was supported by the National Football League Charities and the National Institute of Health/National Institute of Arthritis and Musculoskeletal and Skin Diseases grants RO1-AR049735, RO1-AR049735, RO1-AR056259, and F32-AR055844.” |
| Shelbourne <i>et al</i> <sup>†</sup> (36) | No potential conflicts of interest declared.                                                                                                                                                                                                                                                                                                                  |
| Webster <i>et al</i> <sup>†</sup> (67)    | The authors declare no conflicts of interest. “AOSSM checks author disclosures against the Open Payments Database (OPD). AOSSM has not conducted an independent investigation on the OPD and disclaims any liability or responsibility relating thereto.”                                                                                                     |

<sup>†</sup>Included in meta-analysis

194

195

196

197 **APPENDIX 5. Incidence Numbers by Sex and Laterality**

| Source                                  | Whole Cohort |             |             | Second ACL Injuries |            |            | Ipsilateral Injuries |            |            | Contralateral Injuries |            |            |
|-----------------------------------------|--------------|-------------|-------------|---------------------|------------|------------|----------------------|------------|------------|------------------------|------------|------------|
|                                         | Total        | Females     | Males       | Total               | Female     | Male       | Total                | Female     | Male       | Total                  | Female     | Male       |
| Bak <i>et al</i> <sup>(61)</sup>        | 132          | 15          | 117         | 13*                 | 3          | 1          | 4                    | 3          | 1          | 9*                     | -          | -          |
| Beischer <i>et al</i> <sup>(62)</sup>   | 159          | 102         | 57          | 18                  | 11         | 7          | 10                   | 5          | 5          | 8                      | 6          | 2          |
| Bourke <i>et al</i> <sup>(63)</sup>     | 673          | 241         | 432         | 156                 | 48         | 108        | 71                   | 15         | 56         | 85                     | 33         | 52         |
| Cordasco <i>et al</i> <sup>(51)</sup>   | 23           | 6           | 17          | 1                   | 0          | 1          | 1                    | 0          | 1          | 0                      | 0          | 0          |
| Dekker <i>et al</i> <sup>(64)</sup>     | 85           | 51          | 34          | 27                  | 14         | 13         | 16                   | -          | -          | 11                     | -          | -          |
| Demange <i>et al</i> <sup>(52)</sup>    | 12           | 5           | 7           | 3                   | 1          | 2          | 3                    | 1          | 2          | -                      | -          | -          |
| Everhart <i>et al</i> <sup>(65)</sup>   | 360          | 215         | 145         | 27                  | 10         | 17         | 16                   | 6          | 10         | 11                     | 4          | 7          |
| Fleming <i>et al</i> <sup>(53)</sup>    | 85           | 48          | 42          | 7                   | 5          | 2          | 4                    | 3          | 1          | 3                      | 2          | 1          |
| Geffroy <i>et al</i> <sup>(54)</sup>    | 278          | 123         | 155         | 29*                 | 10         | 13         | 14                   | 3          | 11         | 15*                    | 7          | 2          |
| Graziano <i>et al</i> <sup>(55)</sup>   | 42           | 12          | 30          | 6                   | 2          | 4          | 4                    | 1          | 3          | 2                      | 1          | 1          |
| Gupta <i>et al</i> <sup>(56)</sup>      | 340          | 26          | 314         | 25                  | 4          | 21         | 7                    | 1          | 6          | 18                     | 3          | 15         |
| Heath <i>et al</i> <sup>(67)</sup>      | 247          | 82          | 165         | 81                  | 25         | 56         | 53                   | 14         | 39         | 30                     | 11         | 19         |
| Heijne <i>et al</i> <sup>(68)**</sup>   | 68           | 32          | 36          | 11                  | 9          | 2          | 7                    | 6          | 1          | 4                      | 3          | 1          |
| Kamath <i>et al</i> <sup>(69)</sup>     | 89           | 47          | 42          | 20                  | 11         | 9          | 7                    | 3          | 4          | 13                     | 8          | 5          |
| Laboute <i>et al</i> <sup>(57)</sup>    | 298          | 64          | 234         | 26                  | 5          | 21         | 26                   | 5          | 21         | 0                      | -          | -          |
| Mohtadi <i>et al</i> <sup>(72)</sup>    | 322          | 139         | 183         | 96                  | 43         | 53         | 79                   | 33         | 46         | 17                     | 10         | 7          |
| Paterno <i>et al</i> <sup>(36)</sup>    | 78           | 59          | 19          | 23                  | 19         | 4          | 7                    | 5          | 2          | 16                     | 14         | 2          |
| Shelbourne <i>et al</i> <sup>(38)</sup> | 402          | 319         | 83          | 104                 | 81         | 23         | 41                   | 27         | 14         | 63                     | 54         | 9          |
| Webster <i>et al</i> <sup>(74)</sup>    | 329          | 129         | 200         | 95                  | 36         | 59         | 50                   | 16         | 34         | 45                     | 20         | 25         |
| <b>Totals</b>                           | <b>4027</b>  | <b>1715</b> | <b>2312</b> | <b>771</b>          | <b>337</b> | <b>418</b> | <b>420</b>           | <b>147</b> | <b>257</b> | <b>351</b>             | <b>176</b> | <b>148</b> |

198 †Included in meta-analysis; \*Contralateral injuries were not classified by sex. \*\*2 participants (1 male, 1 female)  
 199 experienced 2 subsequent ACL injuries (1 ipsilateral and 1 contralateral injury each) that could not be clarified  
 200 which occurred first and are still included  
 201  
 202  
 203  
 204

205 **APPENDIX 6.** Funnel Plot

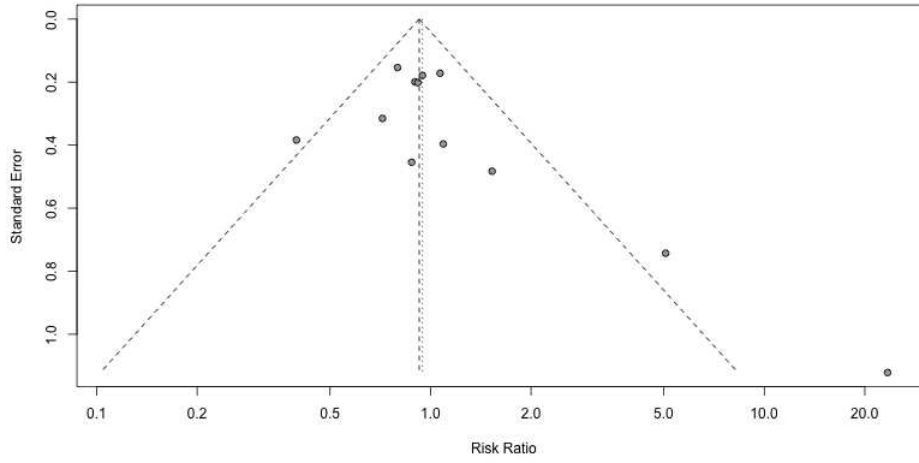

206
