# Supplementary material for: Does sex affect second ACL injury risk? A systematic review with meta-analysis
Source: HighWire-hosted journal article supplement (doi:10.1136/bjsports-2020-103408), 2021-05-17
Supplement: bjsports-2020-103408supp002_data_supplement.pdf [file bjsports-2020-103408supp002_data_supplement.pdf]

### Multiple Choice Questions

1. According to previous literature, what is the relationship between biologic sex and primary ACL injury in athletes?
  - a. Males are more likely than females to incur a primary ACL injury.
  - b. **Females are more likely than males to incur a primary ACL injury.**
  - c. Males and females are equally likely to incur a primary ACL injury.
  - d. This is an area of debate and requires significant more research.
  
2. According to previous literature, which one of the following is not a reason that is believed to contribute to females incurring more primary ACL injuries than males?
  - a. Anatomy
  - b. Hormonal effects
  - c. Biomechanics
  - d. Sport participation
  - e. **All of the above are possible reasons**
  
3. According to this systematic review, what is the relationship between biologic sex and overall second ACL injury in athletes?
  - a. Males are more likely than females to incur a second ACL injury.
  - b. Females are more likely than males to incur a second ACL injury.
  - c. **Males and females are equally likely to incur a second ACL injury.**
  - d. This systematic review did not address this issue.
  
4. According to this systematic review, what is one relationship between biologic sex and laterality of second ACL injury in athletes?
  - a. **Males are more likely to incur a second ACL injury to the ipsilateral knee.**
  - b. Females are more likely to incur a second ACL injury to the ipsilateral knee.
  - c. Males are more likely to incur a second ACL injury to the contralateral knee.
  - d. Females are more likely to incur a second ACL injury to the contralateral knee.
  
5. According to this systematic review, what is another relationship between biologic sex and laterality of second ACL injury in athletes?
  - a. Only males are equally likely to incur a second ACL injury to either knee.
  - b. **Only females are equally likely to incur a second ACL injury to either knee.**
  - c. Both males and females are equally likely to incur a second ACL injury to either knee.
  - d. Neither males nor females are equally likely to incur a second ACL injury to either knee.
